# Supplementary material for: A multi-scanner neuroimaging data harmonization using RAVEL and ComBat
Source: PubMed Central journal article supplement — Neuroimage. Author manuscript; Available in PMC 2022 Feb 7. (PMC8820090; doi:10.1016/j.neuroimage.2021.118703), 2021-11-01
Supplement: NIHMS1770946-supplement-1.pdf [file NIHMS1770946-supplement-1.pdf]

### **Supplementary File 1**

For fitting RAVEL to our data, we explored the effects of the decomposition rank  $b$  and the biological variables age and gender on density plots of tissue types: CSF, GM, and WM. Supplementary Figure 1 contains the plots for which rank was set to either one, two, or three. The results showed that the higher rank, in our case three, gave us greater overlap of the plots, which means better intensity normalization. In the second set of experiments, we controlled models for age and/or gender. The density plots for each of these settings were depicted in Supplementary Figure 2, in which rank was fixed to three. We observed that while controlling for gender did not change the density plots, age widened them, specifically the plots for the WM and GM. Wider density plots could be evidence of resulting in images with lower quality/contrast, which was the exact case for our images. Based on these observations, we decided to fix rank to three and control for no biological variables, when we fitted the final model.

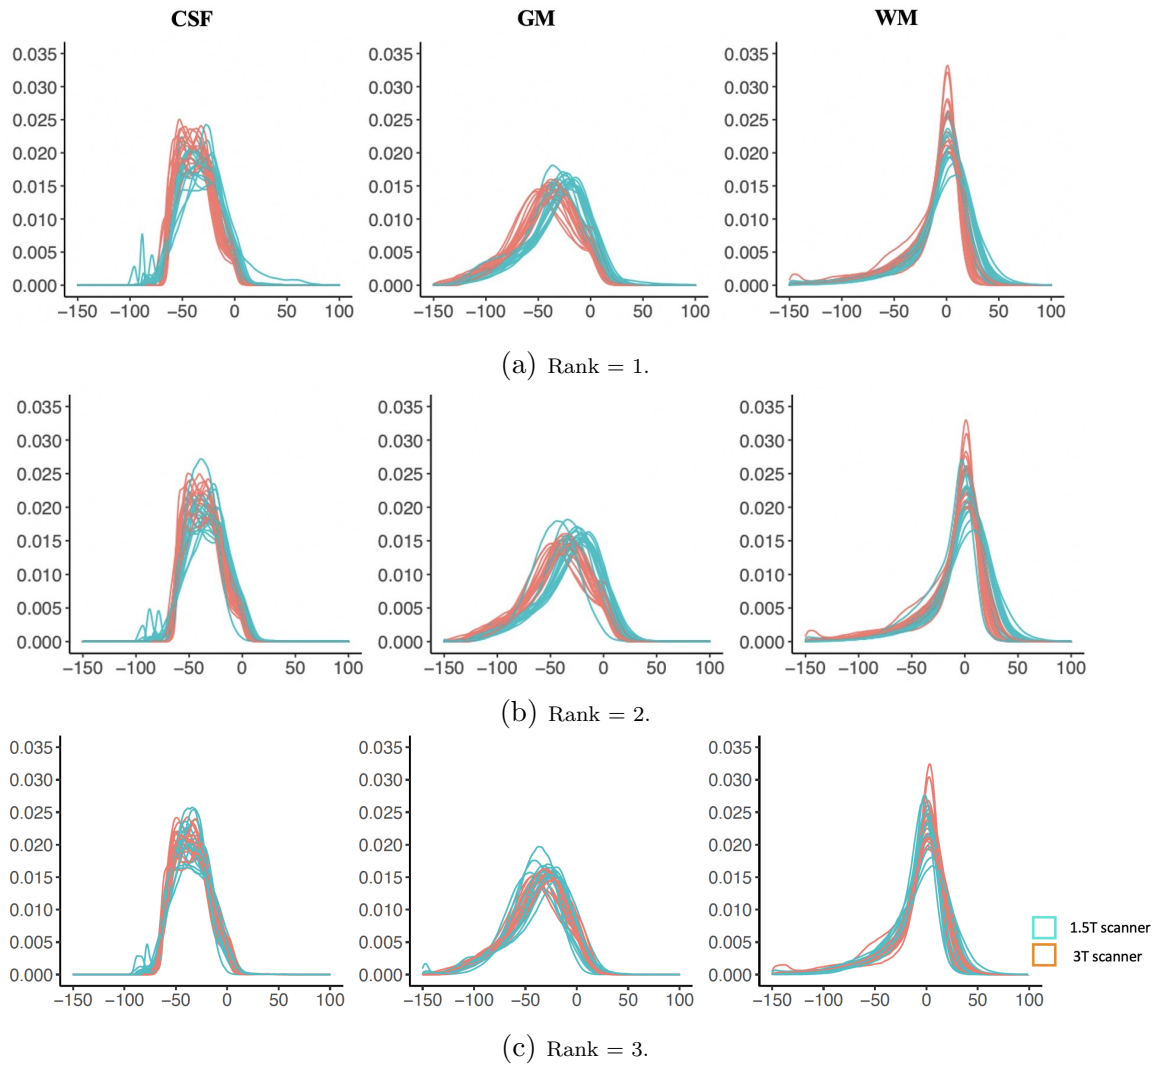

**Supplementary Figure 1:** Density plots of MRI voxel intensities by tissue type (cerebrospinal fluid (CSF), grey matter (GM), and white matter (WM)) across scanners (GE 1.5T (orange) and Siemens 3T (cyan)) by setting (a) Rank = 1, (b) Rank = 2, and (c) Rank = 3.

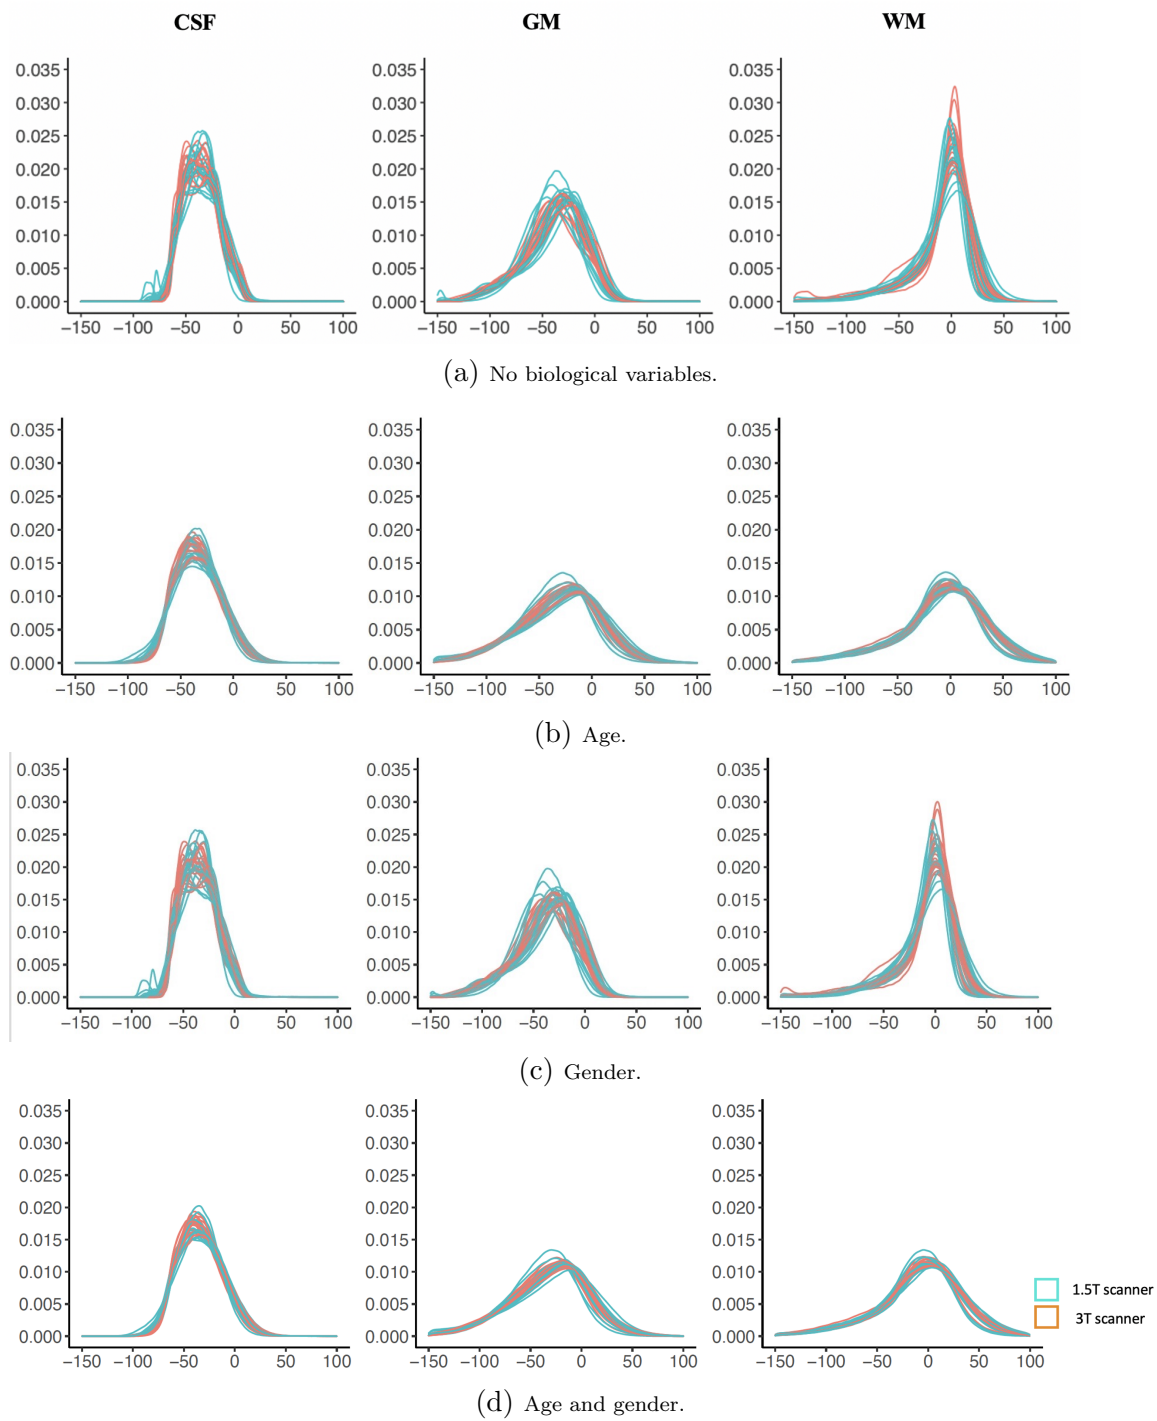

**Supplementary Figure 2:** Density plots of MRI voxel intensities by tissue type (cerebrospinal fluid (CSF), grey matter (GM), and white matter (WM)) across scanners (GE 1.5T (orange) and Siemens 3T (cyan)), controlling for (a) no biological variables, (b) age, (c) gender, and (d) age and gender.

**Supplementary Table 1:** Descriptive statistics, including mean and standard deviation (SD) for FS-derived cortical thickness and volume measures relevant to AD. These statistics are reported for the RAW, RAVEL-normalized, ComBat-harmonized, and RAVEL-ComBat-harmonized measures across GE 1.5T and Siemens 3T scanners. Initially referenced in section 3.1.

| ROIs              | RAW                      |             | RAVEL       |             | ComBat      |             | RAVEL-ComBat |             |
|-------------------|--------------------------|-------------|-------------|-------------|-------------|-------------|--------------|-------------|
|                   | 1.5T                     | 3T          | 1.5T        | 3T          | 1.5T        | 3T          | 1.5T         | 3T          |
| ROIs              | Cortical Thickness (mm)  |             |             |             |             |             |              |             |
| <b>Left</b>       |                          |             |             |             |             |             |              |             |
| Entorhinal        | 2.96 (0.29)              | 3.18 (0.37) | 2.93 (0.29) | 3.12 (0.40) | 3.03 (0.28) | 3.11 (0.36) | 2.94 (0.28)  | 3.12 (0.38) |
| Fusiform          | 2.25 (0.18)              | 2.50 (0.15) | 2.37 (0.25) | 2.47 (0.17) | 2.32 (0.17) | 2.43 (0.16) | 2.37 (0.21)  | 2.47 (0.19) |
| Inferior Parietal | 2.13 (0.15)              | 2.08 (0.13) | 2.22 (0.21) | 2.07 (0.13) | 2.13 (0.14) | 2.09 (0.14) | 2.18 (0.18)  | 2.12 (0.15) |
| Inferior Temporal | 2.32 (0.21)              | 2.57 (0.17) | 2.48 (0.30) | 2.54 (0.18) | 2.39 (0.19) | 2.50 (0.17) | 2.47 (0.26)  | 2.55 (0.21) |
| Middle Temporal   | 2.52 (0.24)              | 2.60 (0.25) | 2.59 (0.22) | 2.57 (0.23) | 2.55 (0.23) | 2.57 (0.25) | 2.56 (0.21)  | 2.60 (0.24) |
| <b>Right</b>      |                          |             |             |             |             |             |              |             |
| Entorhinal        | 3.00 (0.40)              | 3.24 (0.35) | 3.04 (0.24) | 3.22 (0.31) | 3.08 (0.38) | 3.16 (0.36) | 3.05 (0.22)  | 3.21 (0.30) |
| Fusiform          | 2.32 (0.18)              | 2.54 (0.18) | 2.43 (0.20) | 2.48 (0.16) | 2.38 (0.17) | 2.48 (0.18) | 2.42 (0.18)  | 2.48 (0.18) |
| Inferior Parietal | 2.14 (0.19)              | 2.13 (0.15) | 2.20 (0.20) | 2.13 (0.14) | 2.15 (0.18) | 2.12 (0.15) | 2.17 (0.18)  | 2.16 (0.16) |
| Inferior Temporal | 2.33 (0.20)              | 2.59 (0.15) | 2.41 (0.17) | 2.51 (0.16) | 2.40 (0.18) | 2.52 (0.15) | 2.42 (0.15)  | 2.50 (0.16) |
| Middle Temporal   | 2.55 (0.19)              | 2.60 (0.21) | 2.60 (0.16) | 2.59 (0.21) | 2.57 (0.19) | 2.58 (0.20) | 2.58 (0.15)  | 2.61 (0.20) |
| ROIs              | Volume (cm) <sup>3</sup> |             |             |             |             |             |              |             |
| <b>Left</b>       |                          |             |             |             |             |             |              |             |
| Entorhinal        | 1.64 (0.32)              | 1.72 (0.30) | 1.54 (0.34) | 1.74 (0.38) | 1.68 (0.32) | 1.68 (0.29) | 1.58 (0.34)  | 1.70 (0.35) |
| Inferior Temporal | 8.05 (1.03)              | 8.84 (1.57) | 8.48 (1.00) | 8.91 (1.53) | 8.29 (1.10) | 8.60 (1.42) | 8.56 (1.04)  | 8.82 (1.41) |
| Middle Temporal   | 8.80 (1.58)              | 8.96 (2.00) | 9.26 (1.44) | 8.91 (1.81) | 8.96 (1.66) | 8.80 (1.84) | 9.21 (1.47)  | 8.97 (1.69) |
| Amygdala          | 1.40 (0.26)              | 1.53 (0.30) | 1.43 (0.21) | 1.52 (0.25) | 1.43 (0.26) | 1.50 (0.28) | 1.46 (0.22)  | 1.50 (0.23) |
| Hippocampus       | 3.85 (0.46)              | 3.77 (0.48) | 4.00 (0.47) | 3.81 (0.49) | 3.82 (0.46) | 3.79 (0.46) | 3.94 (0.47)  | 3.86 (0.46) |
| <b>Right</b>      |                          |             |             |             |             |             |              |             |
| Entorhinal        | 1.60 (0.34)              | 1.69 (0.36) | 1.55 (0.33) | 1.67 (0.35) | 1.65 (0.35) | 1.65 (0.33) | 1.57 (0.33)  | 1.65 (0.33) |
| Inferior Temporal | 7.71 (1.23)              | 8.69 (1.62) | 7.98 (1.37) | 8.64 (1.52) | 7.99 (1.29) | 8.41 (1.49) | 8.11 (1.38)  | 8.51 (1.43) |
| Middle Temporal   | 9.48 (1.35)              | 9.70 (1.87) | 9.74 (1.39) | 9.80 (1.73) | 9.64 (1.43) | 9.54 (1.71) | 9.76 (1.42)  | 9.78 (1.61) |
| Amygdala          | 1.55 (0.21)              | 1.60 (0.21) | 1.56 (0.19) | 1.58 (0.20) | 1.56 (0.21) | 1.59 (0.20) | 1.57 (0.19)  | 1.57 (0.19) |
| Hippocampus       | 3.99 (0.40)              | 3.90 (0.44) | 4.09 (0.46) | 3.99 (0.42) | 3.96 (0.40) | 3.93 (0.42) | 4.06 (0.45)  | 4.02 (0.41) |

Values 0.00 and  $-0.00$  indicate values  $< 0.005$  and  $< -0.005$ , respectively.

**Supplementary Table 2:** Mean (95% confidence interval) of cross-scanner differences, (Siemens 3T - GE 1.5T), for cortical thickness and volume measures relevant to AD. These statistics were prepared for each of the RAW, RAVEL, ComBat, and RAVEL-ComBat methods, using the paired t-test. The measures with statistically significant differences ( $P < 0.05$ ) were highlighted.

|                   | RAW                      | RAVEL                | ComBat              | RAVEL-ComBat        |
|-------------------|--------------------------|----------------------|---------------------|---------------------|
| ROIs              | Cortical Thickness (mm)  |                      |                     |                     |
| <b>Left</b>       |                          |                      |                     |                     |
| Entorhinal        | 0.22 (0.09, 0.34)        | 0.19 (-0.03, 0.41)   | 0.08 (-0.04, 0.20)  | 0.18 (-0.04, 0.39)  |
| Fusiform          | 0.24 (0.19, 0.30)        | 0.10 (-0.02, 0.23)   | 0.11 (0.06, 0.16)   | 0.10 (-0.02, 0.22)  |
| Inferior Parietal | -0.05 (-0.11, 0.0)       | -0.15 (-0.26, -0.04) | -0.04 (-0.09, 0.01) | -0.04 (-0.16, 0.04) |
| Inferior Temporal | 0.25 (0.16, 0.34)        | 0.06 (-0.08, 0.20)   | 0.11 (0.02, 0.19)   | 0.08 (-0.05, 0.21)  |
| Middle Temporal   | 0.08 (0.00, 0.16)        | -0.01 (-0.11, 0.09)  | 0.02 (-0.06, 0.10)  | 0.03 (-0.07, 0.13)  |
| <b>Right</b>      |                          |                      |                     |                     |
| Entorhinal        | 0.23 (0.00, 0.47)        | 0.17 (-0.01, 0.35)   | 0.08 (-0.15, 0.31)  | 0.15 (-0.02, 0.33)  |
| Fusiform          | 0.22 (0.17, 0.28)        | 0.05 (-0.06, 0.16)   | 0.10 (0.04, 0.15)   | 0.06 (-0.04, 0.17)  |
| Inferior Parietal | -0.02 (-0.06, 0.02)      | -0.07 (-0.15, 0.01)  | -0.02 (-0.06, 0.01) | -0.01 (-0.09, 0.06) |
| Inferior Temporal | 0.26 (0.19, 0.32)        | 0.09 (0.01, 0.18)    | 0.11 (0.06, 0.17)   | 0.08 (0.00, 0.17)   |
| Middle Temporal   | 0.05 (-0.03, 0.14)       | -0.01 (-0.08, 0.06)  | 0.01 (-0.08, 0.09)  | 0.03 (-0.04, 0.10)  |
| ROIs              | Volume (cm) <sup>3</sup> |                      |                     |                     |
| <b>Left</b>       |                          |                      |                     |                     |
| Entorhinal        | 0.08 (-0.05, 0.22)       | 0.19 (-0.03, 0.41)   | 0.01 (-0.12, 0.14)  | 0.12 (-0.09, 0.33)  |
| Inferior Temporal | 0.79 (0.37, 1.21)        | 0.43 (-0.01, 0.88)   | 0.31 (-0.03, 0.66)  | 0.26 (-0.13, 0.65)  |
| Middle Temporal   | 0.16 (-0.29, 0.61)       | -0.35 (-0.91, 0.21)  | -0.16 (-0.55, 0.24) | -0.23 (-0.76, 0.29) |
| Amygdala          | 0.13 (0.03, 0.23)        | 0.09 (0.01, 0.17)    | 0.06 (-0.04, 0.16)  | 0.04 (-0.04, 0.11)  |
| Hippocampus       | -0.08 (-0.16, -0.01)     | -0.19 (-0.29, -0.09) | -0.03 (-0.1, 0.05)  | -0.05 (-0.18, 0.01) |
| <b>Right</b>      |                          |                      |                     |                     |
| Entorhinal        | 0.09 (-0.05, 0.23)       | 0.12 (-0.05, 0.29)   | 0.01 (-0.13, 0.15)  | 0.07 (-0.10, 0.24)  |
| Inferior Temporal | 0.98 (0.55, 1.40)        | 0.67 (0.19, 1.14)    | 0.42 (0.04, 0.80)   | 0.41 (-0.05, 0.86)  |
| Middle Temporal   | 0.21 (-0.27, 0.70)       | 0.06 (-0.39, 0.51)   | -0.10 (-0.52, 0.32) | 0.02 (-0.40, 0.44)  |
| Amygdala          | 0.05 (0.01, 0.10)        | 0.02 (-0.03, 0.06)   | 0.03 (-0.02, 0.08)  | 0.01 (-0.04, 0.05)  |
| Hippocampus       | -0.09 (-0.16, -0.01)     | -0.10 (-0.23, 0.03)  | -0.03 (-0.11, 0.04) | -0.04 (-0.17, 0.08) |

Values 0.00 and -0.00 indicate values  $< 0.005$  and  $< -0.005$ , respectively.

**Supplementary File 2: Experiments on different preprocessing pipelines.**

For investigating the effects of using different preprocessing for RAW and ComBat, we prepared two corresponding new sets of data with different preprocessing steps. For this, we simply removed the preprocessing step used for generating RAW and ComBat data and prepared two new datasets of RAW<sub>Orig</sub> and ComBat<sub>Orig</sub>. We then compared RAW<sub>Orig</sub> with RAW and ComBat<sub>Orig</sub> with ComBat, using paired t-test with 95% confidence interval (CI). The results were reported in Supplementary Tables 3 and 4 within each scanner. For each scanner, the first two columns are the mean (SD) of the datasets to compare and the third column is the results of comparison: mean of directional differences (95% CI) generated by the t-test. The statistically significant differences ( $P < 0.05$ ) are highlighted in the tables.

**Supplementary Table 3:** Comparing different preprocessing pipelines for generating RAW data using paired t-test. For each scanner, the first two columns are the mean (SD) of the corresponding data and the third column is the mean of directional differences (95% confidence interval) of data in the first two columns. The statistically significant differences ( $P < 0.05$ ) were highlighted in the tables.

| ROIs              | 1.5T                     |             |                           | 3T                       |             |                           |
|-------------------|--------------------------|-------------|---------------------------|--------------------------|-------------|---------------------------|
|                   | RAW <sub>Orig</sub>      | RAW         | RAW <sub>Orig</sub> - RAW | RAW <sub>Orig</sub>      | RAW         | RAW <sub>Orig</sub> - RAW |
|                   | Cortical Thickness (mm)  |             |                           | Cortical Thickness (mm)  |             |                           |
| <b>Left</b>       |                          |             |                           |                          |             |                           |
| Entorhinal        | 3.06 (0.39)              | 2.96 (0.29) | 0.10 (-0.26, 0.06)        | 3.42 (0.39)              | 3.18 (0.37) | 0.24 (-0.36, -0.12)       |
| Fusiform          | 2.42 (0.15)              | 2.25 (0.18) | 0.17 (-0.22, -0.11)       | 2.50 (0.17)              | 2.50 (0.15) | 0.00 (-0.05, 0.05)        |
| Inferior Parietal | 2.20 (0.14)              | 2.13 (0.15) | 0.07 (-0.13, -0.02)       | 2.07 (0.14)              | 2.08 (0.13) | -0.01 (-0.02, 0.05)       |
| Inferior Temporal | 2.43 (0.17)              | 2.32 (0.21) | 0.11 (-0.19, -0.02)       | 2.55 (0.17)              | 2.57 (0.17) | -0.02 (-0.04, 0.09)       |
| Middle Temporal   | 2.63 (0.25)              | 2.52 (0.24) | 0.11 (-0.19, -0.03)       | 2.60 (0.23)              | 2.60 (0.25) | 0.00 (-0.06, 0.05)        |
| <b>Right</b>      |                          |             |                           |                          |             |                           |
| Entorhinal        | 3.17 (0.42)              | 3.00 (0.40) | 0.17 (-0.32, -0.01)       | 3.58 (0.40)              | 3.24 (0.35) | 0.34 (-0.52, -0.16)       |
| Fusiform          | 2.47 (0.16)              | 2.32 (0.18) | 0.14 (-0.22, -0.07)       | 2.60 (0.20)              | 2.54 (0.18) | 0.05 (-0.11, -0.00)       |
| Inferior Parietal | 2.20 (0.16)              | 2.14 (0.19) | 0.05 (-0.13, 0.02)        | 2.16 (0.14)              | 2.13 (0.15) | 0.03 (-0.08, 0.02)        |
| Inferior Temporal | 2.41 (0.17)              | 2.33 (0.20) | 0.08 (-0.18, 0.02)        | 2.65 (0.16)              | 2.59 (0.15) | 0.06 (-0.11, -0.01)       |
| Middle Temporal   | 2.68 (0.20)              | 2.55 (0.19) | 0.13 (-0.21, -0.05)       | 2.67 (0.20)              | 2.60 (0.21) | 0.07 (-0.12, -0.01)       |
|                   | Volume (cm) <sup>3</sup> |             |                           | Volume (cm) <sup>3</sup> |             |                           |
| <b>Left</b>       |                          |             |                           |                          |             |                           |
| Entorhinal        | 1.68 (0.27)              | 1.64 (0.32) | 0.04 (-0.26, 0.19)        | 1.68 (0.34)              | 1.72 (0.30) | -0.05 (-0.07, 0.16)       |
| Inferior Temporal | 8.20 (1.73)              | 8.05 (1.03) | 0.15 (-0.65, 0.35)        | 8.50 (1.57)              | 8.84 (1.57) | -0.34 (0.12, 0.56)        |
| Middle Temporal   | 8.49 (1.90)              | 8.80 (1.58) | -0.31 (-0.00, 0.63)       | 8.54 (1.86)              | 8.96 (2.00) | -0.42 (0.14, 0.70)        |
| Amygdala          | 1.39 (0.21)              | 1.40 (0.26) | -0.01 (-0.05, 0.08)       | 1.46 (0.31)              | 1.53 (0.30) | -0.07 (-0.01, 0.15)       |
| Hippocampus       | 3.97 (0.58)              | 3.85 (0.46) | 0.11 (-0.22, -0.01)       | 3.76 (0.55)              | 3.77 (0.48) | -0.01 (-0.08, 0.09)       |
| <b>Right</b>      |                          |             |                           |                          |             |                           |
| Entorhinal        | 1.45 (0.28)              | 1.60 (0.34) | -0.15 (0.03, 0.27)        | 1.59 (0.34)              | 1.69 (0.36) | -0.10 (-0.01, 0.21)       |
| Inferior Temporal | 7.77 (1.49)              | 7.71 (1.23) | 0.06 (-0.41, 0.29)        | 8.39 (1.51)              | 8.69 (1.62) | -0.30 (0.05, 0.56)        |
| Middle Temporal   | 9.63 (1.71)              | 9.48 (1.35) | 0.14 (-0.53, 0.24)        | 9.55 (1.75)              | 9.70 (1.87) | -0.15 (-0.08, 0.38)       |
| Amygdala          | 1.43 (0.19)              | 1.55 (0.21) | -0.11 (0.05, 0.18)        | 1.43 (0.23)              | 1.60 (0.21) | -0.17 (0.10, 0.24)        |
| Hippocampus       | 4.02 (0.49)              | 3.99 (0.40) | 0.04 (-0.15, 0.07)        | 3.86 (0.52)              | 3.90 (0.44) | -0.04 (-0.06, 0.14)       |

Values 0.00 and -0.00 indicate values  $< 0.005$  and  $< -0.005$ , respectively.

**Supplementary Table 4:** Comparing different preprocessing pipelines for generating ComBat data using paired t-test. For each scanner, the first two columns are the mean (SD) of the corresponding data and the third column is the mean of directional differences (95% confidence interval) of data in the first two columns. The statistically significant differences ( $P < 0.05$ ) were highlighted in the tables.

| ROIs              | 1.5T                     |             |                                 | 3T                       |             |                                 |
|-------------------|--------------------------|-------------|---------------------------------|--------------------------|-------------|---------------------------------|
|                   | ComBat <sub>Orig</sub>   | ComBat      | ComBat <sub>Orig</sub> - ComBat | ComBat <sub>Orig</sub>   | ComBat      | ComBat <sub>Orig</sub> - ComBat |
|                   | Cortical Thickness (mm)  |             |                                 | Cortical Thickness (mm)  |             |                                 |
| <b>Left</b>       |                          |             |                                 |                          |             |                                 |
| Entorhinal        | 3.14 (0.38)              | 3.03 (0.28) | 0.11 (-0.05, 0.26)              | 3.35 (0.37)              | 3.11 (0.36) | 0.23 (0.12, 0.34)               |
| Fusiform          | 2.43 (0.15)              | 2.32 (0.17) | 0.11 (0.06, 0.16)               | 2.48 (0.16)              | 2.43 (0.16) | 0.05 (0.01, 0.10)               |
| Inferior Parietal | 2.16 (0.14)              | 2.13 (0.14) | 0.04 (-0.02, 0.09)              | 2.11 (0.13)              | 2.09 (0.14) | 0.02 (-0.01, 0.05)              |
| Inferior Temporal | 2.45 (0.16)              | 2.39 (0.19) | 0.06 (-0.02, 0.14)              | 2.52 (0.17)              | 2.50 (0.17) | 0.03 (-0.04, 0.09)              |
| Middle Temporal   | 2.61 (0.24)              | 2.55 (0.23) | 0.06 (-0.01, 0.14)              | 2.62 (0.22)              | 2.57 (0.25) | 0.05 (-0.00, 0.10)              |
| <b>Right</b>      |                          |             |                                 |                          |             |                                 |
| Entorhinal        | 3.26 (0.41)              | 3.08 (0.38) | 0.18 (0.03, 0.33)               | 3.49 (0.38)              | 3.16 (0.36) | 0.33 (0.15, 0.50)               |
| Fusiform          | 2.49 (0.16)              | 2.38 (0.17) | 0.11 (0.03, 0.18)               | 2.57 (0.18)              | 2.48 (0.18) | 0.09 (0.04, 0.14)               |
| Inferior Parietal | 2.18 (0.16)              | 2.15 (0.18) | 0.03 (-0.04, 0.10)              | 2.18 (0.13)              | 2.12 (0.15) | 0.05 (0.0, 0.10)                |
| Inferior Temporal | 2.46 (0.16)              | 2.4 (0.18)  | 0.06 (-0.03, 0.15)              | 2.59 (0.15)              | 2.52 (0.15) | 0.08 (0.03, 0.12)               |
| Middle Temporal   | 2.66 (0.20)              | 2.57 (0.19) | 0.10 (0.02, 0.18)               | 2.68 (0.19)              | 2.58 (0.20) | 0.10 (0.05, 0.15)               |
| ROIs              | Volume (cm) <sup>3</sup> |             |                                 | Volume (cm) <sup>3</sup> |             |                                 |
| <b>Left</b>       |                          |             |                                 |                          |             |                                 |
| Entorhinal        | 1.68 (0.27)              | 1.68 (0.32) | 0.00 (-0.22, 0.23)              | 1.68 (0.32)              | 1.68 (0.29) | -0.01 (-0.12, 0.10)             |
| Inferior Temporal | 8.25 (1.67)              | 8.29 (1.10) | -0.04 (-0.49, 0.42)             | 8.46 (1.54)              | 8.60 (1.42) | -0.15 (-0.36, 0.07)             |
| Middle Temporal   | 8.50 (1.85)              | 8.96 (1.66) | -0.46 (-0.75, -0.17)            | 8.53 (1.81)              | 8.80 (1.84) | -0.28 (-0.53, -0.02)            |
| Amygdala          | 1.40 (0.22)              | 1.43 (0.26) | -0.03 (-0.10, 0.04)             | 1.44 (0.29)              | 1.50 (0.28) | -0.06 (-0.13, 0.02)             |
| Hippocampus       | 3.90 (0.56)              | 3.82 (0.46) | 0.08 (-0.02, 0.18)              | 3.82 (0.55)              | 3.79 (0.46) | 0.03 (-0.06, 0.11)              |
| <b>Right</b>      |                          |             |                                 |                          |             |                                 |
| Entorhinal        | 1.47 (0.27)              | 1.65 (0.35) | -0.17 (-0.29, -0.05)            | 1.57 (0.33)              | 1.65 (0.33) | -0.08 (-0.18, 0.02)             |
| Inferior Temporal | 7.86 (1.45)              | 7.99 (1.29) | -0.13 (-0.46, 0.21)             | 8.30 (1.47)              | 8.41 (1.49) | -0.11 (-0.34, 0.12)             |
| Middle Temporal   | 9.62 (1.67)              | 9.64 (1.43) | -0.02 (-0.38, 0.35)             | 9.55 (1.70)              | 9.54 (1.71) | 0.01 (-0.20, 0.22)              |
| Amygdala          | 1.43 (0.19)              | 1.56 (0.21) | -0.13 (-0.20, -0.06)            | 1.43 (0.22)              | 1.59 (0.20) | -0.15 (-0.22, -0.08)            |
| Hippocampus       | 3.97 (0.48)              | 3.96 (0.40) | 0.01 (-0.09, 0.12)              | 3.91 (0.51)              | 3.93 (0.42) | -0.02 (-0.11, 0.08)             |

Values 0.00 and -0.00 indicate values  $< 0.005$  and  $< -0.005$ , respectively.



**Supplementary Table 5:** Mean (SD) of FS-derived cortical thickness and volume measures relevant to AD. These statistics are reported for the ComBat-harmonized and Longitudinal-ComBat-harmonized measures across GE 1.5T and Siemens 3T scanners.

| ROIs              | ComBat                   |             | Longitudinal ComBat |             |
|-------------------|--------------------------|-------------|---------------------|-------------|
|                   | 1.5T                     | 3T          | 1.5T                | 3T          |
| ROIs              | Cortical Thickness (mm)  |             |                     |             |
| <b>Left</b>       |                          |             |                     |             |
| Entorhinal        | 3.03 (0.28)              | 3.11 (0.36) | 3.07 (0.28)         | 3.07 (0.37) |
| Fusiform          | 2.32 (0.17)              | 2.43 (0.16) | 2.37 (0.18)         | 2.38 (0.15) |
| Inferior Parietal | 2.13 (0.14)              | 2.09 (0.14) | 2.11 (0.15)         | 2.10 (0.13) |
| Inferior Temporal | 2.39 (0.19)              | 2.50 (0.17) | 2.44 (0.20)         | 2.45 (0.17) |
| Middle Temporal   | 2.55 (0.23)              | 2.57 (0.25) | 2.56 (0.23)         | 2.56 (0.25) |
| <b>Right</b>      |                          |             |                     |             |
| Entorhinal        | 3.08 (0.38)              | 3.16 (0.36) | 3.13 (0.39)         | 3.11 (0.36) |
| Fusiform          | 2.38 (0.17)              | 2.48 (0.18) | 2.43 (0.18)         | 2.44 (0.18) |
| Inferior Parietal | 2.15 (0.18)              | 2.12 (0.15) | 2.14 (0.19)         | 2.13 (0.15) |
| Inferior Temporal | 2.40 (0.18)              | 2.52 (0.15) | 2.45 (0.19)         | 2.46 (0.15) |
| Middle Temporal   | 2.57 (0.19)              | 2.58 (0.20) | 2.58 (0.19)         | 2.57 (0.21) |
| ROIs              | Volume (cm) <sup>3</sup> |             |                     |             |
| <b>Left</b>       |                          |             |                     |             |
| Entorhinal        | 1.68 (0.32)              | 1.68 (0.29) | 1.68 (0.32)         | 1.68 (0.30) |
| Inferior Temporal | 8.29 (1.10)              | 8.6 (1.42)  | 8.41 (1.03)         | 8.49 (1.52) |
| Inferior Parietal | 8.96 (1.66)              | 8.80 (1.84) | 8.89 (1.58)         | 8.87 (1.97) |
| Amygdala          | 1.43 (0.26)              | 1.50 (0.28) | 1.46 (0.26)         | 1.47 (0.29) |
| Hippocampus       | 3.82 (0.46)              | 3.79 (0.46) | 3.82 (0.46)         | 3.80 (0.48) |
| <b>Right</b>      |                          |             |                     |             |
| Entorhinal        | 1.65 (0.35)              | 1.65 (0.33) | 1.65 (0.35)         | 1.65 (0.35) |
| Inferior Temporal | 7.99 (1.29)              | 8.41 (1.49) | 8.15 (1.23)         | 8.26 (1.59) |
| Inferior Parietal | 9.64 (1.43)              | 9.54 (1.71) | 9.6 (1.35)          | 9.58 (1.82) |
| Amygdala          | 1.56 (0.21)              | 1.59 (0.20) | 1.57 (0.22)         | 1.58 (0.21) |
| Hippocampus       | 3.96 (0.40)              | 3.93 (0.42) | 3.95 (0.40)         | 3.93 (0.43) |
